# Supplementary material
Source: Springer Nature journal article supplement (https://www.springermedizin.de/resource/supplementary/12885_2010_2631_MOESM4_ESM.pdf/9461592)

- Benign
- DCIS
- IDC – No Relapse
- IDC – With Relapse

|      |       |       |       |
|------|-------|-------|-------|
| 2/38 | 14/30 | 13/23 | 18/35 |
| 5.3% | 46.7% | 56.5% | 51.4% |

|       |       |       |       |
|-------|-------|-------|-------|
| 4/38  | 19/30 | 18/23 | 22/35 |
| 10.5% | 63.3% | 78.3% | 62.9% |

|      |       |       |       |
|------|-------|-------|-------|
| 3/38 | 15/30 | 17/23 | 30/35 |
| 7.9% | 50.0% | 73.9% | 85.7% |

|       |       |       |       |
|-------|-------|-------|-------|
| 4/38  | 18/30 | 15/23 | 31/35 |
| 10.5% | 60.0% | 65.2% | 88.6% |

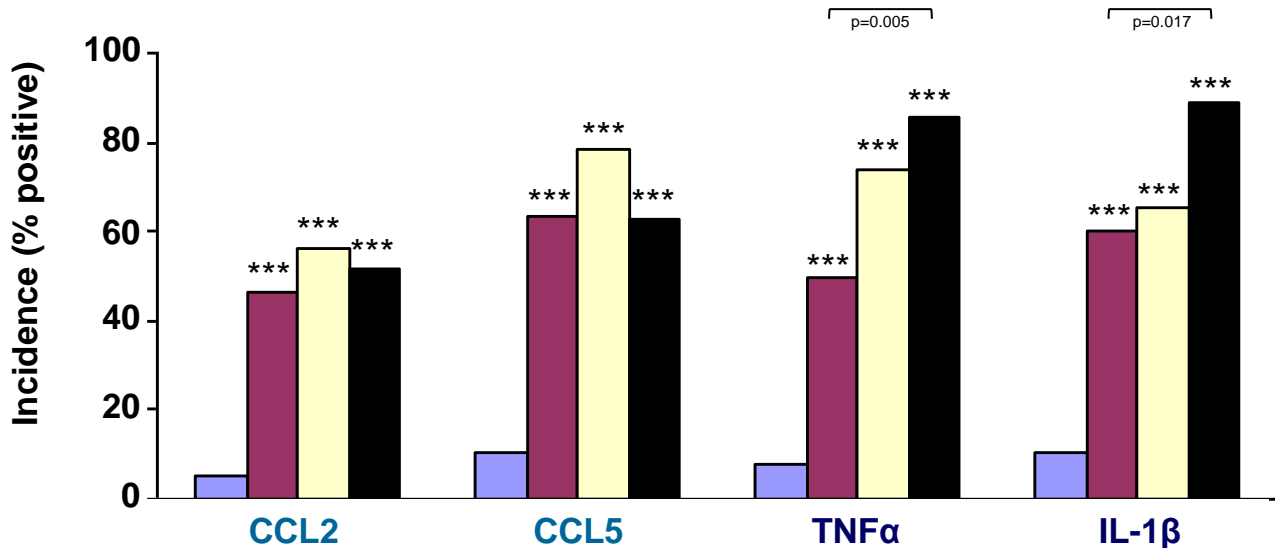

Supplement: MOESM4 [file 9461592]
